# Supplementary material for: Image reconstruction methods affect software-aided assessment of pathologies of [18F]flutemetamol and [18F]FDG brain-PET examinations in patients with neurodegenerative diseases
Source: PubMed Central journal article supplement — Neuroimage Clin. 2020 Aug 19;28:102386. doi: 10.1016/j.nicl.2020.102386 (PMC7476314; doi:10.1016/j.nicl.2020.102386), 2020-08-19
Supplement: mmc1.pdf [file mmc1.pdf]

**Appendix Table 1.** Adjusted P-values from nonparametric Friedman test correcting for multiple comparisons using Dunn's statistical hypothesis testing. Family wise significance at 0.05. All reconstructions are compared to OSEM 3i/16s 5 mm filter with the same reference region.

| Reconstruction      | <sup>18</sup> F]Flutemetamol |         |         |         |          |         |         |         | <sup>18</sup> F]FDG |         |         |         |          |         |         |         |
|---------------------|------------------------------|---------|---------|---------|----------|---------|---------|---------|---------------------|---------|---------|---------|----------|---------|---------|---------|
|                     | Patients                     |         |         |         | Controls |         |         |         | Patients            |         |         |         | Controls |         |         |         |
|                     | SUVR                         |         | Z-score |         | SUVR     |         | Z-score |         | SUVR                |         | Z-score |         | SUVR     |         | Z-score |         |
|                     | GC                           | Pons    | GC      | Pons    | GC       | Pons    | GC      | Pons    | WC                  | WB      | WC      | WB      | WC       | WB      | WC      | WB      |
| OSEM 3i16s3mm       | >0.9999                      | >0.9999 | >0.9999 | >0.9999 | >0.9999  | >0.9999 | >0.9999 | >0.9999 | >0.9999             | >0.9999 | >0.9999 | 0.2196  | 0.8838   | 0.0016  | 0.4664  | 0.0003  |
| OSEM 3i34s3mm       | >0.9999                      | 0.0953  | >0.9999 | 0.0256  | >0.9999  | 0.0356  | >0.9999 | 0.0127  | >0.9999             | <0.0001 | >0.9999 | <0.0001 | 0.0052   | <0.0001 | 0.0031  | <0.0001 |
| OSEM 3i34s5mm       | >0.9999                      | >0.9999 | >0.9999 | >0.9999 | 0.375    | >0.9999 | 0.6166  | >0.9999 | >0.9999             | 0.0747  | >0.9999 | 0.0148  | >0.9999  | 0.0052  | >0.9999 | 0.0013  |
| TOFOSEM 3i16s3mm    | 0.5146                       | 0.0143  | >0.9999 | 0.0017  | 0.592    | 0.0013  | 0.7509  | 0.0002  | >0.9999             | <0.0001 | >0.9999 | <0.0001 | 0.7047   | <0.0001 | 0.2957  | <0.0001 |
| TOFOSEM 3i16s5mm    | 0.0328                       | >0.9999 | 0.0534  | >0.9999 | 0.344    | >0.9999 | 0.9795  | 0.909   | >0.9999             | >0.9999 | >0.9999 | >0.9999 | >0.9999  | >0.9999 | 0.9238  | >0.9999 |
| TOFOSEM 3i34s3mm    | >0.9999                      | 0.0008  | >0.9999 | <0.0001 | 0.875    | 0.0006  | >0.9999 | 0.0002  | 0.8319              | <0.0001 | 0.3115  | <0.0001 | 0.0587   | <0.0001 | 0.0317  | <0.0001 |
| TOFOSEM 3i34s5mm    | 0.336                        | 0.2494  | 0.4914  | 0.029   | 0.102    | 0.8754  | 0.3911  | 0.7223  | >0.9999             | 0.4245  | >0.9999 | 0.0423  | >0.9999  | 0.0345  | 0.9375  | 0.0227  |
| TOFOSEMPSF 3i16s3mm | >0.9999                      | <0.0001 | >0.9999 | <0.0001 | 0.005    | <0.0001 | 0.0143  | <0.0001 | <0.0001             | <0.0001 | <0.0001 | <0.0001 | <0.0001  | <0.0001 | <0.0001 | <0.0001 |
| TOFOSEMPSF 3i16s5mm | >0.9999                      | 0.0637  | >0.9999 | 0.0125  | 0.026    | 0.0004  | 0.0791  | <0.0001 | 0.0008              | 0.1282  | 0.0004  | 0.0347  | 0.026    | 0.1228  | 0.0069  | 0.1181  |
| TOFOSEMPSF 3i34s3mm | >0.9999                      | <0.0001 | >0.9999 | <0.0001 | 0.118    | <0.0001 | 0.1183  | <0.0001 | <0.0001             | <0.0001 | <0.0001 | <0.0001 | <0.0001  | <0.0001 | <0.0001 | <0.0001 |
| TOFOSEMPSF 3i34s5mm | >0.9999                      | 0.0068  | >0.9999 | 0.0008  | 0.011    | <0.0001 | 0.0255  | <0.0001 | 0.0005              | <0.0001 | <0.0001 | <0.0001 | 0.0034   | <0.0001 | 0.0032  | <0.0001 |
| BSREM β75           | 0.3884                       | <0.0001 | 0.1646  | <0.0001 | 0.008    | <0.0001 | 0.0494  | <0.0001 | <0.0001             | <0.0001 | <0.0001 | <0.0001 | <0.0001  | <0.0001 | <0.0001 | <0.0001 |
| BSREM β150          | >0.9999                      | <0.0001 | 0.5146  | <0.0001 | 0.004    | <0.0001 | 0.0047  | <0.0001 | <0.0001             | <0.0001 | <0.0001 | <0.0001 | <0.0001  | <0.0001 | <0.0001 | <0.0001 |
| BSREM β225          | 0.2494                       | <0.0001 | 0.1402  | <0.0001 | 0.029    | <0.0001 | 0.0083  | <0.0001 | <0.0001             | <0.0001 | <0.0001 | <0.0001 | <0.0001  | <0.0001 | <0.0001 | <0.0001 |
| BSREM β300          | 0.5146                       | <0.0001 | 0.2899  | <0.0001 | 0.2      | <0.0001 | 0.1824  | <0.0001 | <0.0001             | <0.0001 | <0.0001 | <0.0001 | <0.0001  | <0.0001 | <0.0001 | <0.0001 |

GC: gray cerebellum; WC: whole cerebellum; WB: whole brain
